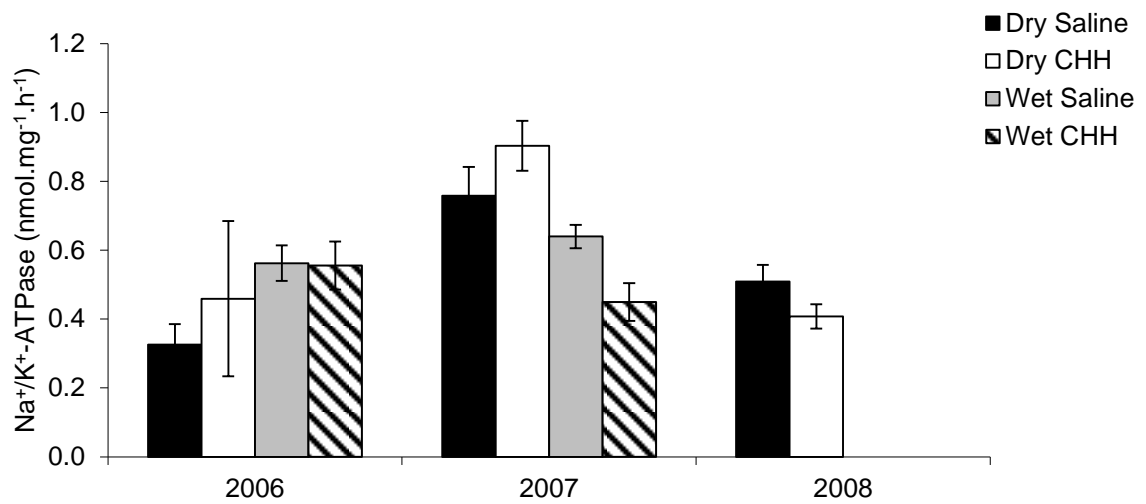

**Fig. 1.** [Na<sup>+</sup>/K<sup>+</sup>-ATPase] in the gills of *G. natalis* after infusion with either a saline control or CHH at 100 pmol.crab<sup>-1</sup> in different seasons. One-way ANOVA and Tukey's tests for multiple comparisons used for statistical analysis. The data were square-root transformed prior to analysis. Bars represent mean ± SEM (n=8).

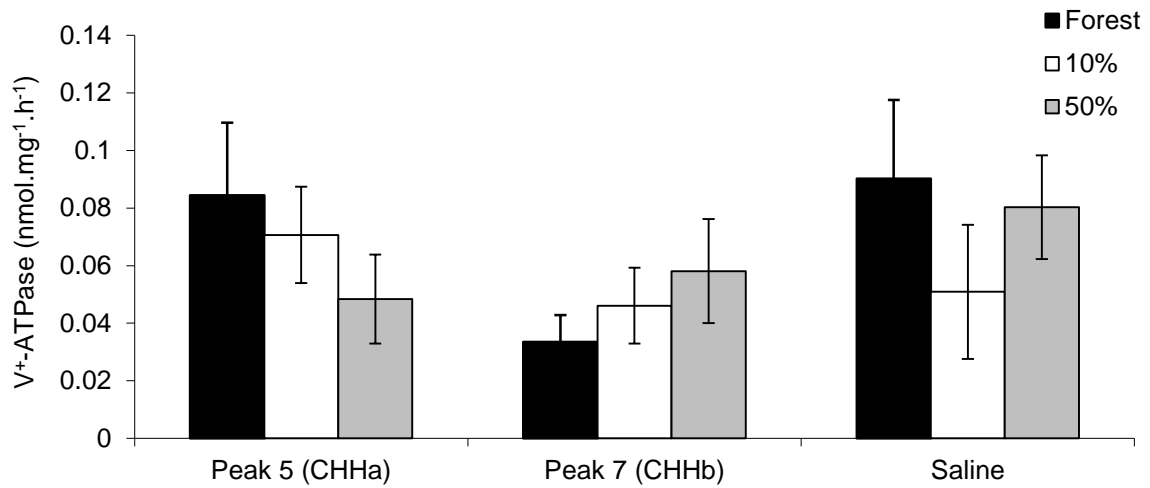

**Fig. 2.** The effect of CHH on V-ATPase activity in the gills of *D. celeste* ( $\mu\text{mol.mg}^{-1}.\text{h}^{-1}$ ). Crabs were injected with either CHHa, CHHb ( $100 \text{ pmol.crab}^{-1}$ ) or a saline control after being collected directly from the rainforest or acclimated for 14 days to either 10% or 50% seawater. Bars represent mean  $\pm$  SEM ( $n=7$ ) (two-way ANOVA and Tukey's tests).
